## THE EFFECT OF INCREASED AMBIENT CO<sub>2</sub> ON ARTERIAL CO<sub>2</sub> TENSION, CO<sub>2</sub> CONTENT AND pH IN RAINBOW TROUT

By JAMES N. CAMERON AND DAVID J. RANDALL

*Institute of Arctic Biology, University of Alaska, College, Alaska 99701, and  
Department of Zoology, University of British Columbia,  
Vancouver 8, B.C., Canada*

(Received 18 February 1972)

### INTRODUCTION

Aquatic animals, particularly in fresh water, may encounter water with CO<sub>2</sub> levels above that observed in air. If  $P_{aCO_2}$  in teleost fish is dependent upon conditions for diffusion across the gill epithelium and the ventilation/perfusion ratio ( $\dot{V}_G/Q$  ratio), then  $P_{aCO_2}$  will always be above ambient. The only way  $P_{aCO_2}$  can be regulated in the face of a rise in ambient water  $P_{CO_2}$  is to reduce the  $P_{CO_2}$  difference between inspired water and arterial blood. The capacity for such regulation is small.  $P_{aCO_2}$  in fish in air-equilibrated water is only of the order of 2-3 mmHg (Randall, 1970). In mammals the difference between ambient air and arterial blood  $P_{CO_2}$  can be adjusted by altering ventilation. Increases in  $\dot{V}_G$  above resting level in rainbow trout did not cause any change in arterial pH and total CO<sub>2</sub> content (Randall and Cameron, 1972*b*). Fish therefore appear unable to regulate  $P_{aCO_2}$  in the face of a rise in ambient  $P_{CO_2}$  by changes in ventilation.

A rise in  $P_{aCO_2}$  will result in a fall in blood pH unless there is a concomitant rise in blood [HCO<sub>3</sub><sup>-</sup>]. Regulation of arterial blood pH would be similar in this instance to that observed by Randall & Cameron (1972*a*). They reported that trout regulate arterial blood pH as temperature changes by altering plasma [HCO<sub>3</sub><sup>-</sup>] levels.  $P_{aCO_2}$  did not change with temperature.

Fish exposed to water of high CO<sub>2</sub> content may therefore regulate  $P_{aCO_2}$  by a reduction of the  $P_{CO_2}$  difference between water and arterial blood. However, the capacity to regulate this parameter is limited, and in the face of large changes in ambient  $P_{CO_2}$ ,  $P_{aCO_2}$  must increase. The rise in  $P_{aCO_2}$  will be associated with a fall in blood pH or a rise in blood [HCO<sub>3</sub><sup>-</sup>] levels. The object of this study was to determine the relationship between arterial blood pH and  $P_{aCO_2}$  in the face of an increase in ambient  $P_{CO_2}$ .

### MATERIALS AND METHODS

All experiments were carried out on rainbow trout obtained from Sun Valley Trout Farm, Chilliwack, B.C., Canada. The fish weighed between 200 and 300 g, and were maintained in outdoor tanks at a water temperature of  $12 \pm 2$  °C. All experiments were carried out at  $13 \pm 1$  °C.

For all *in vivo* experiments the fish were anaesthetized with MS 222 and a cannula

was implanted in the dorsal aorta as described by Smith & Bell (1964). Recovery for 24–48 h was allowed before any measurements were made. Variations in blood pH other than those resulting from changes in  $P_{aCO_2}$ , are probably due either to transient increases in blood lactate levels or to diuretic imbalance of the animal due to handling and anaesthesia. To avoid the former source, animals were kept in blackened chambers, and disturbance from the investigator was minimized. For the latter, papers by Houston and co-workers (1969, 1971 *a, b*) indicate that the major part of post-operative trauma has disappeared after 24 h recovery, and that 24 h levels of most measured parameters were not significantly different from 72 h values.

Measurements of pH and  $P_{aCO_2}$  were made with a Radiometer PHM 71 acid-base analyzer, using thin silicone rubber membranes on the  $CO_2$  electrode and calibration gas mixtures supplied by Wösthof gas mixing pumps. Total  $CO_2$  measurements were made using an electrode and cuvette system described by Cameron (1971).

*In vitro* measurements of  $CO_2$  dissociation curves and pH *v.*  $P_{CO_2}$  curves were made after equilibration of blood samples in a temperature-controlled shaker bath. Gas mixtures were passed through water saturators, and then into tonometers holding the blood.

Most measurement errors are small; total  $CO_2$  values are estimated to be accurate to  $\pm 2\%$  (Cameron, 1971), and pH measurement errors are probably about 0.01 pH unit. However, the measurements of  $P_{CO_2}$  are undoubtedly less precise, since the electrode response time is slow at 13 °C. The necessary increase in meter gain to measure very low  $P_{aCO_2}$  values induces instability errors. In order to minimize this source of error, calibration was performed before *and* after each measurement. Still, error is likely to be about  $\pm 20\%$ . Even so, the conclusions of the work are not affected.

Water used in the experiments came from two sources: water low in  $CO_2$  came from a de-chlorinated city water system, and water high in  $CO_2$  from a well and concrete reservoir system. The  $P_{CO_2}$  and total  $CO_2$  content of the former were below detection limits, and averaged 2.5 torr, 1 mM respectively, for the latter. Detection limit for  $P_{CO_2}$  was approx. 0.3 torr, and for total  $CO_2$  approx. 0.2 mM/l.

Experimental procedure was to maintain the fish in low- $CO_2$  environments for at least a day or two, while the normal levels of pH,  $P_{CO_2}$ , etc., were measured, then to transfer them to the water of high  $CO_2$ . After at least 24 h at high  $P_{I(CO_2)}$  the various parameters were re-measured.

Unless otherwise indicated, all means are given plus or minus standard error, and 5% was taken as the limit of statistical significance.

## RESULTS

In Table 1 results are shown for six fish that were held first at low  $P_{I(CO_2)}$  and then at the high  $P_{I(CO_2)}$ . Also shown are results for an additional four fish held only at the high  $P_{I(CO_2)}$ . For each fish, the figure in any column represents the mean of all measurements for that fish under those conditions, and is an average of from 2–10 separate measurements. Grand means are given at the bottom of the columns plus or minus one standard error. Also shown is the haematocrit for each fish; haematocrit tended to drop somewhat over the experimental period, due to sampling.

For the low- $CO_2$  group, ambient  $CO_2$  was assumed to be zero in the calculation of

Table 1. Changes in arterial pH, CO<sub>2</sub> tension and CO<sub>2</sub> content caused by transfer from low to high environmental CO<sub>2</sub>

(Figures in columns are means of all measurements for that particular animal; grand means are given plus or minus standard error. CO<sub>2</sub> tensions are in torr, and total CO<sub>2</sub> in mM/l.)

| Fish no.    | $P_{aCO_2}$ | $P_{I(OO_2)} - P_{aCO_2}$ | pH          | Total CO <sub>2</sub> | Haematocrit (%) | Treatment            |
|-------------|-------------|---------------------------|-------------|-----------------------|-----------------|----------------------|
| 1           | 1.77        | 1.77                      | 7.99        | 4.91                  | 27.8            | Low CO <sub>2</sub>  |
| 2           | 1.31        | 1.31                      | 8.08        | 4.52                  | 20.6            |                      |
| 3           | 1.78        | 1.78                      | 8.05        | 5.49                  | 18.3            |                      |
| 4           | 1.80        | 1.80                      | 7.99        | 5.05                  | 18.5            |                      |
| 5           | 2.13        | 2.13                      | 7.99        | 5.11                  | 17.8            |                      |
| 6           | 1.91        | 1.91                      | 7.99        | 4.50                  | 23.7            |                      |
| Mean ± s.e. | 1.78 ± 0.11 | 1.78 ± 0.11               | 8.02 ± 0.02 | 4.93 ± 0.15           | 21.1 ± 1.61     | < 0.3 torr           |
| 1           | 3.57        | 1.37                      | 7.89        | 10.95                 | 20.8            | High CO <sub>2</sub> |
| 2           | —           | —                         | 7.98        | 10.84                 | 14.8            |                      |
| 3           | —           | —                         | 7.87        | 9.09                  | 14.6            |                      |
| 4           | 4.36        | 2.16                      | 7.94        | 11.48                 | 17.2            |                      |
| 5           | 4.29        | 2.09                      | 7.89        | 11.70                 | 15.5            |                      |
| 6           | 5.43        | 3.23                      | 7.92        | 12.63                 | 12.5            |                      |
| 7           | 2.92        | 0.70                      | 7.96        | 8.42                  | 21.4            |                      |
| 8           | 2.85        | 0.63                      | 7.98        | 7.45                  | 25.3            |                      |
| 9           | 2.90        | 0.68                      | 7.90        | 7.28                  | 19.1            |                      |
| 10          | 3.55        | 1.33                      | 7.94        | 9.82                  | 21.1            |                      |
| Mean ± s.e. | 3.73 ± 0.32 | 1.52 ± 0.32               | 7.93 ± 0.01 | 9.97 ± 0.59           | 18.2 ± 1.26     | ~ 2.5 torr           |
| t-value     | 5.05        | 0.66                      | 4.56        | 6.50                  | 1.41            |                      |
| P           | < 0.01      | ns                        | < 0.01      | < 0.01                | ns              |                      |

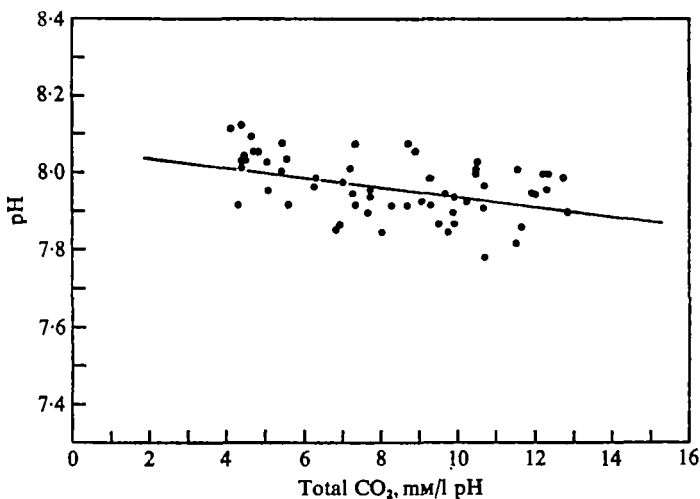

Fig. 1. Combined data on arterial pH v. total CO<sub>2</sub> for the fish analysed in Table 1. The line is a least-squares regression:  $pH = 8.06 - 0.013 [\Sigma CO_2]$ , where  $\Sigma CO_2$  is in mM/l.

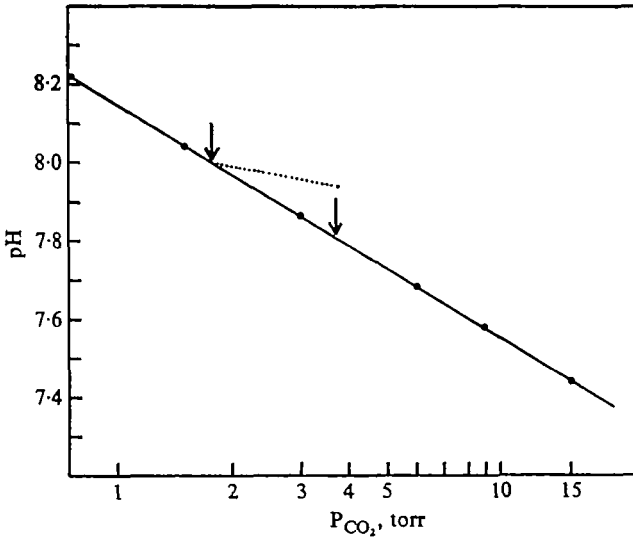

Fig. 2. Typical *in vitro* pH *v.*  $P_{CO_2}$  curve; slope determined from ten different curves. See text for explanation of arrows. Dotted line shows observed pH change *in vivo* as  $P_{aCO_2}$  is increased.

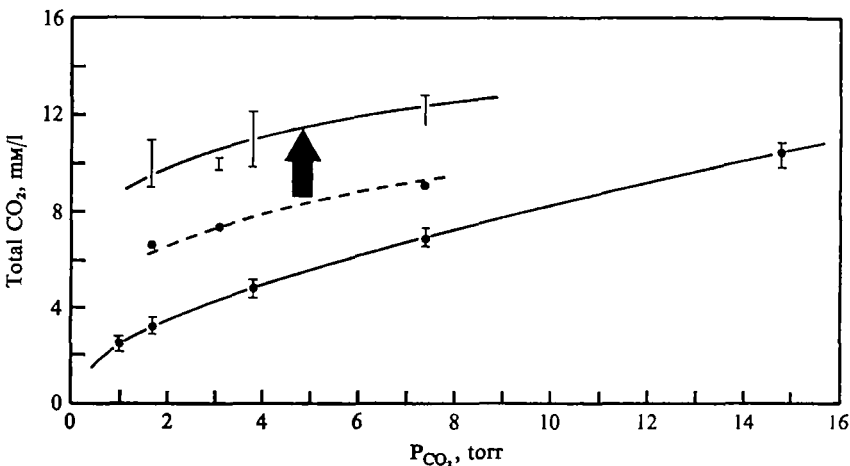

Fig. 3. Dissociation curves determined *in vitro* at 13 °C for whole blood. Lowest curve is an average for four fish, triplicate determinations for each. Upper curves show change as  $P_{I(CO_2)}$  is increased.

$P_I - P_a$ . However, if the water is assumed to have been air-saturated, it would have had a  $P_{CO_2}$  of 0.22 torr, and the gradient would then be 1.56 torr, virtually identical with the high- $CO_2$  group.

The four fish tested only in a high- $CO_2$  environment (nos. 7-10) had somewhat lower total  $CO_2$  and a lower gradient from blood to water. However, their  $P_{aCO_2}$  and total  $CO_2$  values were still significantly higher than those of the control fish and were not separated in the analysis. Part of this difference may be due to the shorter length of observation for the fish tested only in high  $CO_2$  (see Discussion below).

Although the pH data given in Table 1 show a significant drop in pH at the higher

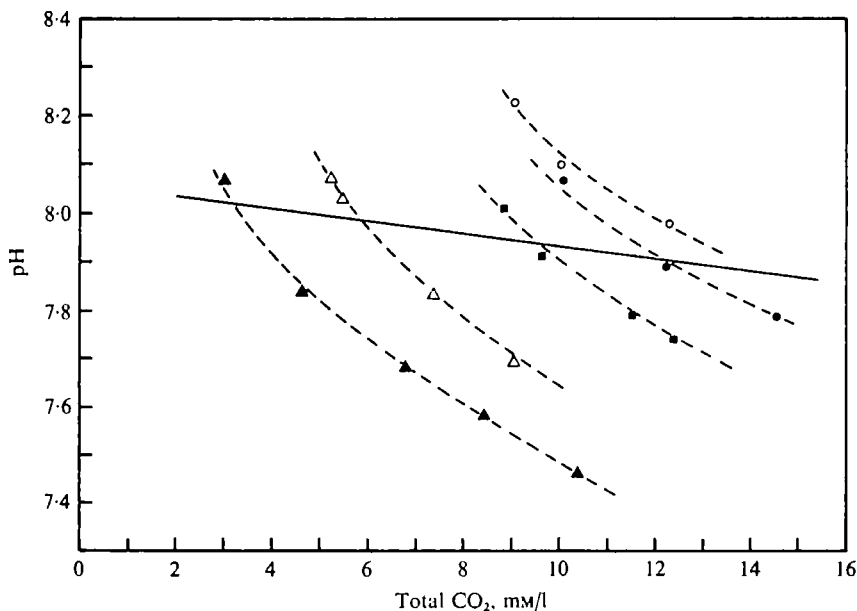

Fig. 4. *In vitro* curves for pH *v.*  $\Sigma\text{CO}_2$  shown superimposed on regression line for *in vivo* pH changes. Curves on left determined at low  $\text{CO}_2$ , those on the right at high  $\text{CO}_2$ .

ambient  $\text{CO}_2$  tensions, the data are shown in more detail in Fig. 1. Linear regression analysis yielded the following relationship:

$$[\text{pH}] = 8.06 - 0.013[\Sigma\text{CO}_2]$$

where  $\Sigma\text{CO}_2$  is expressed in mm/l. This relationship will vary with temperature and is for trout at 13 °C. The regression was significant at the 1% level. One can now calculate the pH change that would be expected due to the increase in  $P_{a\text{CO}_2}$  at constant bicarbonate and compare it to the pH change actually observed. Fig. 2 shows a typical pH *v.*  $P_{\text{CO}_2}$  curve, with slope calculated from curves determined for ten different fish *in vitro*. From this curve, the pH change expected due to  $P_{a\text{CO}_2}$  increase from 1.78 to 3.73 torr (arrows on Fig. 2) is seen to be about 0.19 pH units. From the regression equation of pH *v.*  $\text{CO}_2$  the observed pH change is 0.06 pH units (dotted line, Fig. 2). In other words, although the pH did drop in response to increased  $P_{I(\text{CO}_2)}$  and  $P_{a\text{CO}_2}$ , the change was only about one-third of what it would have been without adjustment of the bicarbonate and total  $\text{CO}_2$  (Table 1).

The effect of increased total  $\text{CO}_2$  on the  $\text{CO}_2$  dissociation curve is shown in Fig. 3. The lower curves were determined *in vitro* from fish held in normal water, and the upper ones were determined from fish held for varying periods in high  $\text{CO}_2$ . The arrow indicates the direction of the shift in dissociation curve.

The effect of the changes in dissociation curve and pH are shown in Fig. 4, where the regression line for pH change *v.* total  $\text{CO}_2$  *in vivo* is shown, along with curves of pH *v.* total  $\text{CO}_2$  determined *in vitro* for some of the fish in Table 1. Without changes in the dissociation curve, a shift to the right along the total  $\text{CO}_2$  axis would cause a pH change following any one of the curves down and to the right.

## DISCUSSION

The results indicate that rainbow trout do not adjust the  $P_{\text{CO}_2}$  difference between arterial blood and water in the face of an increase in ambient  $P_{\text{CO}_2}$ . In fact,  $Pa_{\text{CO}_2}$  increased in proportion to the change in ambient  $P_{\text{CO}_2}$ , such that  $Pa_{\text{CO}_2}$  is always about 2 mmHg above ambient. The rise in  $Pa_{\text{CO}_2}$  with an increase in ambient  $P_{\text{CO}_2}$  did not result in a large change in arterial blood pH. Blood bicarbonate levels were adjusted to regulate blood pH. These results support the more general conclusion that arterial blood pH in aquatic vertebrates is adjusted by changes in plasma bicarbonate rather than in  $Pa_{\text{CO}_2}$ . Also ventilation in aquatic animals is not a mechanism by which  $Pa_{\text{CO}_2}$  and therefore arterial pH is regulated (Randall & Cameron, 1972*a, b*).

Two further papers add support to the conclusions of the present work. Lloyd & White (1967) and Lloyd & Jordan (1964) describe increases in the blood plasma bicarbonate following acclimation to high levels of  $\text{CO}_2$ . They rightly conclude that the purpose of the observed increase is to maintain pH. They also observe that there is a concomitant decrease in the plasma chloride concentration. The changes in bicarbonate and chloride were of approximately the same magnitude and were reversed when the animals were restored to water of low  $P_{\text{CO}_2}$ . Further support for a  $\text{HCO}_3^-/\text{Cl}^-$  exchange in fish has been presented by Maetz & Romeu (1964) and Dejourn (1969). Fish transferred to water of very low chloride content show a marked reduction in  $\text{CO}_2$  excretion immediately following transfer. Maetz & Romeu (1964) were able to alter chloride movements across the gill by altering the  $\text{CO}_2$  gradient across the gills. We suggest that in freshwater the fish links chloride influx to  $\text{HCO}_3^-$  efflux, thus replacing chloride lost by diffusion and excreting a portion of the metabolically produced  $\text{CO}_2$  as bicarbonate. Upon transfer to an environment high in  $\text{CO}_2$ , bicarbonate/chloride exchange is reduced, chloride efflux continues, plasma chloride falls and the anion deficit is made up by bicarbonate as  $\text{CO}_2$  accumulates in the blood. Bicarbonate/chloride exchange may even be reversed on occasion. Dejourn (1969) observed a net uptake of  $\text{CO}_2$  when fish were transferred to water of very low chloride content.

Profound difficulties are experienced when trying to speculate about the mechanisms of  $\text{CO}_2$  excretion and pH regulation in salt water, granted that the above description of chloride-bicarbonate exchange in freshwater is accurate. Presumably chloride uptake in salt water would be an expensive and non-adaptive method of getting rid of metabolic  $\text{CO}_2$ . Furthermore, excretion of bicarbonate by the kidney seems unlikely in view of the much reduced urine flow in marine teleosts, and the lack of particularly high concentrations of bicarbonate in the urine. An altered carbonic anhydrase system may provide much faster conversion time of bicarbonate to  $\text{CO}_2$  at the gill, facilitating diffusive  $\text{CO}_2$  loss. Salt water fishes obviously offer an opportunity for much new research.

Lloyd & White (1967) measured the time course of bicarbonate/chloride exchange upon exposure to high  $\text{CO}_2$ . Bicarbonate and chloride levels change slowly, the process approaching completion within 24 h. Regulation of arterial pH is therefore a slow process in fish and accounts for the wide range of recorded values for arterial pH in fish at any one temperature (e.g. Houston, 1971, table 1). Activity, or any other change in the animal that results in an increase in the hydrogen ion concentration in th

blood will cause a prolonged fall in arterial blood pH (Piiper & Baumgarten, 1969).

Eddy & Morgan (1969) observed no change in blood oxygen capacity or haemoglobin concentration in fish acclimated to high CO<sub>2</sub>. Although a reduction in capacity may have occurred initially due to the Root effect, accumulation of bicarbonate in the blood presumably negated any change in arterial blood pH as a result of a rise in  $P_{aCO_2}$ . Blood oxygen capacity was therefore not affected by the prolonged change in  $P_{aCO_2}$ .

## SUMMARY

1. The effect of exposure of rainbow trout to high and low levels of environmental (water) CO<sub>2</sub> tension on blood CO<sub>2</sub> and pH was studied.
2. An increase in environmental CO<sub>2</sub> caused a rise in the arterial CO<sub>2</sub> tension ( $P_{aCO_2}$ ), but the blood-to-water gradient ( $P_I - P_a$ ) remained about the same.
3. Changes in arterial pH were small – about one-third of what would be predicted from the change in  $P_{aCO_2}$ , if plasma bicarbonate remained constant.
4. There was a corresponding increase in the total CO<sub>2</sub> content of the blood which involved an upward shift of the CO<sub>2</sub> dissociation curve, and readjustment of the buffering to maintain pH.
5. The results are consistent with the hypothesis that blood CO<sub>2</sub> and pH levels are regulated via a chloride–bicarbonate exchange mechanism, rather than by ventilation and diffusive washout of gaseous CO<sub>2</sub>.

Much of the work was performed while one author (J.N.C.) was a Postdoctoral Fellow at University of B.C., supported by NIH Fellowship 5-F02-HE 36334-02. The work was also supported by research grants from the National Research Council of Canada and the B.C. Heart Foundation.

## REFERENCES

- CAMERON, J. N. (1971). A rapid method for determination of total carbon dioxide in small blood samples. *J. appl. Physiol.* **31**, 632–5.
- DEJOURS, P. (1969). Variations of CO<sub>2</sub> output of a fresh-water teleost upon change of the ionic composition of water. *Proc. Physiol. Soc.*, March 1969, 113P–114P.
- EDDY, F. B. & MORGAN, R. I. G. (1969). Some effects of carbon dioxide on the blood of rainbow trout, *Salmo gairdneri*. *J. Fish. Biol.* **1**, 361–72.
- HOUSTON, A. H. (1971). Some comments upon acid-base balance in teleost fishes and its relationship to environmental temperature. *Comp. Biochem. Physiol.* **40**, 535–42.
- HOUSTON, A. H., DEWILDE, M. A. & MADDEN, J. A. (1969). Some physiological consequences of aortic catheterization in the brook trout (*Salvelinus fontinalis*). *J. Fish. Res. Bd Can.* **26**, 1847–56.
- HOUSTON, A. H., MADDEN, J. A., WOODS, R. J. & MILES, J. M. (1971a). Some physiological effects of handling and tricaine methanesulphonate anesthetization upon the brook trout, *Salvelinus fontinalis*. *J. Fish. Res. Bd Can.* **28**, 625–33.
- HOUSTON, A. H., MADDEN, J. A., WOODS, R. J. & MILES, J. M. (1971b). Variations in the blood and tissue chemistry of brook trout, *Salvelinus fontinalis*, subsequent to handling, anaesthesia, and surgery. *J. Fish. Res. Bd Can.* **28**, 635–42.
- LLOYD, R. & JORDAN, D. H. M. (1964). Some factors affecting the resistance of rainbow trout (*Salmo gairdneri* Richardson) to acid waters. *Int. J. Air. Wat. Poll.* **8**, 393.
- LLOYD, R. & WHITE, W. R. (1967). Effect of high concentration of carbon dioxide on the ionic composition of rainbow trout blood. *Nature, Lond.* **216**, 1341–2.
- MAETZ, J. & GARCIA-ROMEU, F. (1964). The mechanism of sodium and chloride uptake by the gills of a fresh-water fish *Carassius auratus*. *J. gen. Physiol.* **47**, 1209–26.

- PIIPER, J. & BAUMGARTEN, D. (1969). Blood lactate and acid-base balance in the elasmobranch *Scyliorhinus stellaris* after exhausting activity. *Pubbl. Staz. zool. Napoli* **37**, 84-94.
- RANDALL, D. J. (1970). The circulatory system. In *Fish Physiology*, vol. iv (ed. W. S. Hoar and D. J. Randall), pp. 133-72. New York: Academic Press.
- RANDALL, D. J. & CAMERON, J. N. (1972*a*). The effect of temperature on arterial pH,  $P_{CO_2}$  and gill ventilation in the rainbow trout. (In preparation.)
- RANDALL, D. J. & CAMERON, J. N. (1972*b*). The role of gill ventilation in the regulation of arterial  $P_{CO_2}$  and pH in rainbow trout. (In preparation.)
- ROOT, R. W. (1931). Respiratory function of the blood of marine fishes. *Biol. Bull. mar. biol. Lab., Woods Hole* **61**, 426-56.
- SMITH, L. S. & BELL, G. R. (1964). A technique for prolonged blood sampling in free-swimming salmon. *J. Fish. Res. Bd Can.* **21**, 711-717.
